# Supplementary material for: Three-Dimensional Study of F. graminearum Colonisation of Stored Wheat: Post-Harvest Growth Patterns, Dry Matter Losses and Mycotoxin Contamination
Source: MDPI journal article supplement (doi:10.3390/microorganisms8081170), 2020-08-01
Supplement: s1 [file s1]

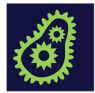

## Supplementary Material

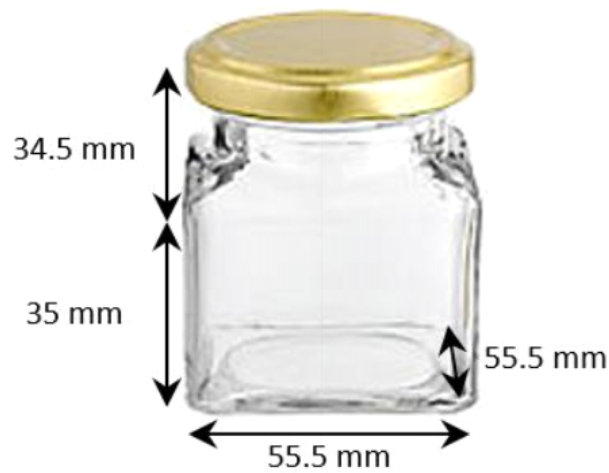

**Figure S1.** Clear square jars used in this experiment. Adapted from Pattesons Glass Ltd (nd).

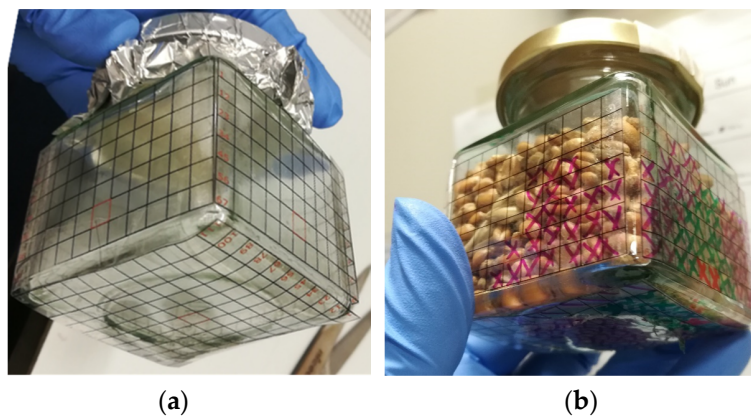

**Figure S2.** Labelling system used to follow 3D colonisation of wheat grains by *F. graminearum*. (a) Jar with square mesh labels without grains, and (b) example of the 3D colonisation attained after 4 days of incubation.
